# Supplementary material for: Targeted Metabolomics Analysis on Obstructive Sleep Apnea Patients after Multilevel Sleep Surgery
Source: MDPI journal article supplement (doi:10.3390/metabo10090358), 2020-09-01
Supplement: s1 [file s1]

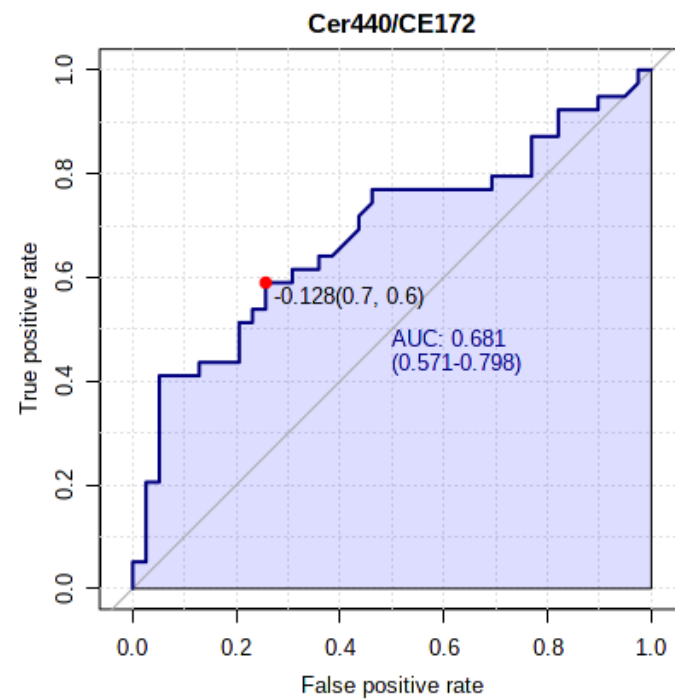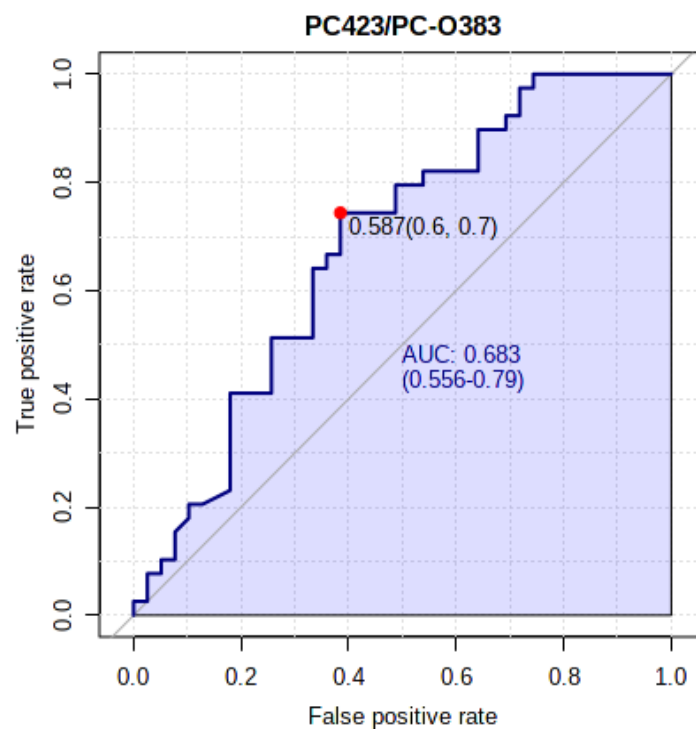

**Supplementary Figure 1:** The area-under-the-curve (AUC) of Receiver Operating Characteristic (ROC) analysis showing ratio between the Cer440/CE172 and PC423/PC-O383 specificity and selectivity to distinguish between the study groups.
